# Supplementary material for: Genome-Wide Identification and Expression Analysis of SnRK Gene Family under Abiotic Stress in Cucumber (Cucumis sativus L.)
Source: MDPI journal article supplement (doi:10.3390/agronomy12071550), 2022-06-28
Supplement: s1 [file s1]

Table S1. Primer sequence of *CsSnRK2* for real-time RT-PCR

| Gene Name         | Gene ID          | Primer sequence (forward/reverse 5'to 3') |                      |
|-------------------|------------------|-------------------------------------------|----------------------|
|                   |                  | F                                         | R                    |
| <i>CsActin</i>    | LOC101215469     | TCGTGCTGGATTCTGGTG                        | GGCAGTGGTGGTGAACAT   |
| <i>CsSnRK2.1</i>  | CsaV3_2G014200.1 | GCTGTTAAGTACATTGAAAGAGGTG                 | CCGGCGTTACATATCCGCT  |
| <i>CsSnRK2.2</i>  | CsaV3_2G016930.1 | CCATGCAATGCAAGTGTGTCA                     | TGCAGGTGTTCCGACTGTTG |
| <i>CsSnRK2.3</i>  | CsaV3_3G002220.1 | CGCATATTTGTCGCCAACCC                      | TTTAGACGCTTCTCCTGGCG |
| <i>CsSnRK2.4</i>  | CsaV3_4G030050.1 | GAGCTTCTCTCTCCAAGGCG                      | CTCCGCTTGCATGAACTTCT |
| <i>CsSnRK2.5</i>  | CsaV3_4G030080.1 | GGTGCTGGAAGTTTGGTGT                       | TCGCCCCTAAACAACCTCC  |
| <i>CsSnRK2.6</i>  | CsaV3_4G030100.1 | GCACGTGGAAGGAAC TTGG                      | CAACTGTGGTGCTTGGCATC |
| <i>CsSnRK2.7</i>  | CsaV3_4G030120.1 | ATTTAGCAGCCCGAGAGCC                       | CCACATGACCATACATCCGC |
| <i>CsSnRK2.8</i>  | CsaV3_4G030260.1 | GCCAAGGGAGCTGACAGAAT                      | GTTTCTTGCCTCTCCACGA  |
| <i>CsSnRK2.9</i>  | CsaV3_6G045260.1 | TGAGAGGGGCCAAAAGATCG                      | GATGCGTGGGAGTGAGTAGG |
| <i>CsSnRK2.10</i> | CsaV3_7G008840.1 | ACAGCCAATACGAAGAGCCC                      | GCTGCCGGTAAGGTATTGGT |

Table S2. cis-acting regulatory elements in CsSnRK promoters of cucumber.

| Gene Name        | hormone responsive elements |             |            |       |     |             |             | stress responsive elements |     |           |
|------------------|-----------------------------|-------------|------------|-------|-----|-------------|-------------|----------------------------|-----|-----------|
|                  | ABA                         | Auxin       |            | Eth   |     | SA          | MeJA        | Drought                    |     | Anaerobic |
|                  | ABRE                        | TGA-element | AuxRR-core | P-box | ERE | TCA-element | CGTCA-motif | MBS                        | MYC | ARE       |
| CsaV3_6G006250.1 | <i>CsSnRK1.1</i>            | 2           | 1          |       | 2   | 1           |             |                            | 1   | 2         |
| CsaV3_2G014200.1 | <i>CsSnRK2.1</i>            | 1           |            |       |     | 7           | 1           |                            | 4   | 1         |
| CsaV3_2G016930.1 | <i>CsSnRK2.2</i>            | 4           |            |       | 1   | 2           | 1           |                            | 1   | 2         |
| CsaV3_3G002220.1 | <i>CsSnRK2.3</i>            | 4           | 1          | 1     |     | 4           | 1           |                            | 7   | 3         |
| CsaV3_4G030050.1 | <i>CsSnRK2.4</i>            | 1           |            |       | 1   | 2           |             |                            | 5   |           |
| CsaV3_4G030080.1 | <i>CsSnRK2.5</i>            | 1           |            |       |     | 2           | 3           |                            | 2   | 2         |
| CsaV3_4G030100.1 | <i>CsSnRK2.6</i>            |             |            |       | 1   | 1           | 2           | 1                          | 3   | 1         |
| CsaV3_4G030120.1 | <i>CsSnRK2.7</i>            |             |            |       | 1   | 1           | 1           |                            | 6   |           |
| CsaV3_4G030260.1 | <i>CsSnRK2.8</i>            | 2           | 1          |       | 1   | 2           | 1           |                            | 3   | 6         |
| CsaV3_6G045260.1 | <i>CsSnRK2.9</i>            | 2           | 1          |       | 2   | 2           | 2           | 2                          | 4   | 4         |
| CsaV3_7G008840.1 | <i>CsSnRK2.10</i>           |             | 1          |       | 4   | 2           | 1           | 2                          | 4   |           |
| CsaV3_1G028820.1 | <i>CsSnRK3.1</i>            | 6           |            |       | 2   | 2           | 2           | 1                          | 2   |           |
| CsaV3_1G030280.1 | <i>CsSnRK3.2</i>            | 2           | 1          |       |     |             | 1           |                            | 3   | 1         |
| CsaV3_1G033260.1 | <i>CsSnRK3.3</i>            |             |            |       |     |             | 4           | 2                          | 1   | 2         |
| CsaV3_1G036820.1 | <i>CsSnRK3.4</i>            | 2           |            |       |     | 3           |             |                            | 5   | 3         |
| CsaV3_2G003670.1 | <i>CsSnRK3.5</i>            | 9           | 1          |       |     | 6           | 3           | 3                          | 1   | 2         |
| CsaV3_2G013250.1 | <i>CsSnRK3.6</i>            |             | 1          | 1     |     |             |             |                            | 5   | 2         |
| CsaV3_2G030480.1 | <i>CsSnRK3.7</i>            | 1           |            |       |     | 3           | 1           | 1                          | 2   | 4         |
| CsaV3_3G007670.1 | <i>CsSnRK3.8</i>            | 1           |            |       |     | 1           | 1           | 2                          | 7   | 2         |
| CsaV3_3G012720.1 | <i>CsSnRK3.9</i>            | 2           | 1          |       |     | 5           | 1           | 1                          | 5   |           |
| CsaV3_3G015590.1 | <i>CsSnRK3.10</i>           | 4           |            |       |     | 4           |             | 1                          | 7   | 1         |
| CsaV3_4G017300.1 | <i>CsSnRK3.11</i>           |             |            |       |     | 1           | 2           |                            | 3   | 4         |
| CsaV3_4G036630.1 | <i>CsSnRK3.12</i>           | 1           | 1          | 1     |     | 4           |             |                            | 2   | 3         |
| CsaV3_6G000230.1 | <i>CsSnRK3.13</i>           | 1           | 1          | 1     | 1   | 1           | 1           | 1                          | 6   | 1         |
| CsaV3_6G000240.1 | <i>CsSnRK3.14</i>           | 2           | 1          |       |     | 4           |             |                            | 3   | 5         |
| CsaV3_6G019060.1 | <i>CsSnRK3.15</i>           | 2           | 1          | 1     |     |             |             |                            | 1   | 2         |

|                   |                   |   |   |   |   |   |   |   |
|-------------------|-------------------|---|---|---|---|---|---|---|
| CsaV3_6G019070.1  | <i>CsSnRK3.16</i> | 2 | 2 | 2 | 2 | 1 |   |   |
| CsaV3_6G050960.1  | <i>CsSnRK3.17</i> | 7 |   |   |   | 1 | 1 | 4 |
| CsaV3_6G051970.1  | <i>CsSnRK3.18</i> | 5 |   |   | 8 | 2 | 1 | 2 |
| CsaV3_UNG100750.1 | <i>CsSnRK3.19</i> | 2 |   |   | 1 | 1 | 2 | 1 |
